# Supplementary material
Source: ML conference proceedings conference paper supplement (https://proceedings.neurips.cc/paper_files/paper/2020/hash/d17e6bcbcef8de3f7a00195cfa5706f1-Abstract.html)
Supplement: Supplementary file [file d17e6bcbcef8de3f7a00195cfa5706f1-Supplemental.zip]

401  
402  
403

# Distributed Newton Can Communicate Less and Resist Byzantine Workers Supplementary Material

## 404 8 Appendix A: Analysis of Section 3

### 405 Matrix Sketching

406 Here we briefly discuss the matrix sketching that is broadly used in the context of *randomized*  
407 *linear algebra*. For any matrix  $\mathbf{A} \in \mathbb{R}^{n \times d}$  the sketched matrix  $\mathbf{Z} \in \mathbb{R}^{s \times d}$  is defined as  $\mathbf{S}^T \mathbf{A}$  where  
408  $\mathbf{S} \in \mathbb{R}^{n \times s}$  is the sketching matrix (typically  $s < n$ ). Based on the scope and basis of the application,  
409 the sketched matrix is constructed by taking linear combination of the rows of matrix which is known  
410 as *random projection* or by sampling and scaling a subset of the rows of the matrix which is known  
411 as *random sampling*. The sketching is done to get a smaller representation of the original matrix to  
412 reduce computational cost.

413 Here we consider a uniform row sampling scheme. The matrix  $\mathbf{Z}$  is formed by sampling and scaling  
414 rows of the matrix  $\mathbf{A}$ . Each row of the matrix  $\mathbf{A}$  is sampled with probability  $p = \frac{1}{n}$  and scaled by  
415 multiplying with  $\frac{1}{\sqrt{sp}}$ .

$$\mathbb{P}\left(\mathbf{z}_i = \frac{\mathbf{a}_j}{\sqrt{sp}}\right) = p,$$

416 where  $\mathbf{z}_i$  is the  $i$ -th row matrix  $\mathbf{Z}$  and  $\mathbf{a}_j$  is the  $j$  th row of the matrix  $\mathbf{A}$ . Consequently the sketching  
417 matrix  $\mathbf{S}$  has one non-zero entry in each column.

418 We define the matrix  $\mathbf{A}_t^\top = [\mathbf{a}_1^\top, \dots, \mathbf{a}_n^\top] \in \mathbb{R}^{d \times n}$  where  $\mathbf{a}_j = \sqrt{\ell_j''(\mathbf{w}^\top \mathbf{x}_j)} \mathbf{x}_j$ . So the exact  
419 Hessian in equation (2) is  $\mathbf{H}_t = \frac{1}{n} \mathbf{A}_t^\top \mathbf{A}_t + \lambda \mathbf{I}$ . Assume that  $S_i$  is the set of features that are held by  
420 the  $i$ th worker machine. So the local Hessian is

$$\mathbf{H}_{i,t} = \frac{1}{s} \sum_{j \in S_i} \ell_j''(\mathbf{w}^\top \mathbf{x}_j) \mathbf{x}_j \mathbf{x}_j^\top + \lambda \mathbf{I} = \frac{1}{s} \mathbf{A}_{i,t}^\top \mathbf{A}_{i,t} + \lambda \mathbf{I},$$

421 where  $\mathbf{A}_{i,t} \in \mathbb{R}^{s \times d}$  and the row of the matrix  $\mathbf{A}_{i,t}$  is indexed by  $S_i$ . Also we define  $\mathbf{B}_t =$   
422  $[\mathbf{b}_1, \dots, \mathbf{b}_n] \in \mathbb{R}^{d \times n}$  where  $\mathbf{b}_i = \ell_i'(\mathbf{w}^\top \mathbf{x}_i) \mathbf{x}_i$ . So the exact gradient in equation (2) is  $\mathbf{g}_t =$   
423  $\frac{1}{n} \mathbf{B}_t \mathbf{1} + \lambda \mathbf{w}_t$  and the local gradient is

$$\mathbf{g}_{i,t} = \frac{1}{s} \sum_{i \in S_i} \ell_i'(\mathbf{w}_t^\top \mathbf{x}_i) \mathbf{x}_i + \lambda \mathbf{w}_t = \frac{1}{s} \mathbf{B}_{i,t} \mathbf{1} + \lambda \mathbf{w}_t,$$

424 where  $\mathbf{B}_{i,t}$  is the matrix with column indexed by  $S_i$ . If  $\{\mathbf{S}_i\}_{i=1}^m$  are the sketching matrices then the  
425 local Hessian and gradient can be expressed as

$$\mathbf{H}_{i,t} = \mathbf{A}_t^\top \mathbf{S}_i \mathbf{S}_i^\top \mathbf{A}_t + \lambda \mathbf{I} \quad \mathbf{g}_{i,t} = \frac{1}{n} \mathbf{B} \mathbf{S}_i \mathbf{S}_i^\top \mathbf{1} + \lambda \mathbf{w}. \quad (9)$$

426 With the help of sketching idea later we show that the local hessian and gradient are close to the exact  
427 hessian and gradient.

428 **The Quadratic function** For the purpose of analysis we define an auxiliary quadratic function

$$\phi(\mathbf{p}) = \frac{1}{2} \mathbf{p}^\top \mathbf{H}_t \mathbf{p} - \mathbf{g}_t^\top \mathbf{p} = \frac{1}{2} \mathbf{p}^\top (\mathbf{A}_t^\top \mathbf{A}_t + \lambda \mathbf{I}) \mathbf{p} - \mathbf{g}_t^\top \mathbf{p}. \quad (10)$$

429 The optimal solution to the above function is

$$\mathbf{p}^* = \arg \min \phi(\mathbf{p}) = \mathbf{H}_t^{-1} \mathbf{g}_t = (\mathbf{A}_t^\top \mathbf{A}_t + \lambda \mathbf{I})^{-1} \mathbf{g}_t,$$

430 which is also the optimal direction of the global Newton update. In this work we consider the local  
431 and global (approximate ) Newton direction to be

$$\hat{\mathbf{p}}_{i,t} = (\mathbf{A}^\top \mathbf{S}_i \mathbf{S}_i^\top \mathbf{A} + \lambda \mathbf{I})^{-1} \mathbf{g}_{i,t}, \quad \hat{\mathbf{p}}_t = \frac{1}{m} \sum_{i=1}^m \hat{\mathbf{p}}_{i,t}.$$

432 respectively. And it can be easily verified that each local update  $\hat{\mathbf{p}}_{i,t}$  is optimal solution to the  
 433 following quadratic function

$$\hat{\phi}_{i,t}(p) = \frac{1}{2} \mathbf{p}^\top (\mathbf{A}^\top \mathbf{S}_i \mathbf{S}_i^\top \mathbf{A} + \lambda \mathbf{I}) \mathbf{p} - \mathbf{g}_i^\top \mathbf{p}. \quad (11)$$

434 In our convergence analysis we show that value of the quadratic function in (10) with value  $\hat{\mathbf{p}}_t$  is  
 435 close to the optimal value.

436 **Singular Value Decomposition (SVD)** For any matrix  $\mathbf{A} \in \mathbb{R}^{n \times d}$  with rank  $r$ , the singular value  
 437 decomposition is defined as  $\mathbf{A} = \mathbf{U} \mathbf{\Sigma} \mathbf{V}^\top$  where  $\mathbf{U}, \mathbf{V}$  are  $n \times r$  and  $d \times r$  column orthogonal  
 438 matrices respectively and  $\mathbf{\Sigma}$  is a  $r \times r$  diagonal matrix with diagonal entries  $\{\sigma_1, \dots, \sigma_r\}$ . If  $\mathbf{A}$  is a  
 439 symmetric positive semi-definite matrix then  $\mathbf{U} = \mathbf{V}$ .

## 440 8.1 Analysis

441 **Lemma 1** (McDiarmid's Inequality). *Let  $X = X_1, \dots, X_m$  be  $m$  independent random variables*  
 442 *taking values from some set  $A$ , and assume that  $f : A^m \rightarrow \mathbb{R}$  satisfies the following condition*  
 443 *(bounded differences ):*

$$\sup_{x_1, \dots, x_m, \hat{x}_i} |f(x_1, \dots, x_i, \dots, x_m) - f(x_1, \dots, \hat{x}_i, \dots, x_m)| \leq c_i,$$

444 *for all  $i \in \{1, \dots, m\}$ . Then for any  $\epsilon > 0$  we have*

$$P[f(X_1, \dots, X_m) - \mathbb{E}[f(X_1, \dots, X_m)] \geq \epsilon] \leq \exp\left(-\frac{2\epsilon^2}{\sum_{i=1}^m c_i^2}\right).$$

445 The property described in the following Lemma 2 is a very useful result for uniform row sampling  
 446 sketching matrix.

447 **Lemma 2** (Lemma 8 [30]). *Let  $\eta, \delta \in (0, 1)$  be a fixed parameter and  $r = \text{rank}(\mathbf{A}_t)$  and  $\mathbf{U} \in$   
 448  $\mathbb{R}^{n \times r}$  be the orthonormal bases of the matrix  $\mathbf{A}_t$ . Let  $\{\mathbf{S}_i\}_{i=1}^m$  be sketching matrices and  $\mathbf{S} =$   
 449  $\frac{1}{\sqrt{m}}[\mathbf{S}_1, \dots, \mathbf{S}_m] \in \mathbb{R}^{n \times ms}$ . With probability  $1 - \delta$  the following holds*

$$\|\mathbf{U}^\top \mathbf{S}_i \mathbf{S}_i^\top \mathbf{U} - \mathbf{I}\|_2 \leq \eta \quad \forall i \in [m] \quad \text{and} \quad \|\mathbf{U}^\top \mathbf{S} \mathbf{S}^\top \mathbf{U} - \mathbf{I}\|_2 \leq \frac{\eta}{\sqrt{m}}.$$

450 **Lemma 3.** *Let  $\mathbf{S} \in \mathbb{R}^{n \times s}$  be any uniform sampling sketching matrix, then for any matrix  $\mathbf{B} =$   
 451  $[\mathbf{b}_1, \dots, \mathbf{b}_n] \in \mathbb{R}^{d \times n}$  with probability  $1 - \delta$  for any  $\delta > 0$  we have,*

$$\left\| \frac{1}{n} \mathbf{B} \mathbf{S} \mathbf{S}^\top \mathbf{1} - \frac{1}{n} \mathbf{B} \mathbf{1} \right\| \leq (1 + \sqrt{2 \ln(\frac{1}{\delta})}) \sqrt{\frac{1}{s}} \max_i \|\mathbf{b}_i\|,$$

452 *where  $\mathbf{1}$  is all ones vector.*

453 *Proof.* The vector  $\mathbf{B} \mathbf{1}$  is the sum of column of the matrix  $\mathbf{B}$  and  $\mathbf{B} \mathbf{S} \mathbf{S}^\top \mathbf{1}$  is the sum of uniformly  
 454 sampled and scaled column of the matrix  $\mathbf{B}$  where the scaling factor is  $\frac{1}{\sqrt{sp}}$  with  $p = \frac{1}{n}$ . If  $(i_1, \dots, i_s)$   
 455 is the set of sampled indices then  $\mathbf{B} \mathbf{S} \mathbf{S}^\top \mathbf{1} = \sum_{k \in (i_1, \dots, i_s)} \frac{1}{sp} \mathbf{b}_k$ .

456 Define the function  $f(i_1, \dots, i_s) = \left\| \frac{1}{n} \mathbf{B} \mathbf{S} \mathbf{S}^\top \mathbf{1} - \frac{1}{n} \mathbf{B} \mathbf{1} \right\|$ . Now consider a sampled set  
 457  $(i_1, \dots, i_{j'}, \dots, i_s)$  with only one item (column) replaced then the bounded difference is

$$\begin{aligned} \Delta &= |f(i_1, \dots, i_j, \dots, i_s) - f(i_1, \dots, i_{j'}, \dots, i_s)| \\ &= \left| \frac{1}{n} \left\| \frac{1}{sp} \mathbf{b}_{i_{j'}} - \frac{1}{sp} \mathbf{b}_{i_j} \right\| \right| \leq \frac{2}{s} \max_i \|\mathbf{b}_i\|. \end{aligned}$$

458 Now we have the expectation

$$\begin{aligned} \mathbb{E}[\left\| \frac{1}{n} \mathbf{B} \mathbf{S} \mathbf{S}^\top \mathbf{1} - \frac{1}{n} \mathbf{B} \mathbf{1} \right\|^2] &\leq \frac{n}{sn^2} \sum_{i=1}^n \|\mathbf{b}_i\|^2 = \frac{1}{s} \max_i \|\mathbf{b}_i\|^2 \\ \Rightarrow \mathbb{E}[\left\| \frac{1}{n} \mathbf{B} \mathbf{S} \mathbf{S}^\top \mathbf{1} - \frac{1}{n} \mathbf{B} \mathbf{1} \right\|] &\leq \sqrt{\frac{1}{s}} \max_i \|\mathbf{b}_i\|. \end{aligned}$$

459 Using McDiarmid inequality (Lemma 1) we have

$$P\left[\left\|\frac{1}{n}\mathbf{B}\mathbf{S}\mathbf{S}^\top\mathbf{1} - \frac{1}{n}\mathbf{B}\mathbf{1}\right\| \geq \sqrt{\frac{1}{s}} \max_i \|\mathbf{b}_i\| + t\right] \leq \exp\left(-\frac{2t^2}{s\Delta^2}\right).$$

460 Equating the probability with  $\delta$  we have

$$\begin{aligned} \exp\left(-\frac{2t^2}{s\Delta^2}\right) &= \delta \\ \Rightarrow t &= \Delta \sqrt{\frac{s}{2} \ln\left(\frac{1}{\delta}\right)} = \max_i \|\mathbf{b}_i\| \sqrt{\frac{2}{s} \ln\left(\frac{1}{\delta}\right)}. \end{aligned}$$

461 Finally we have with probability  $1 - \delta$

$$\left\|\frac{1}{n}\mathbf{B}\mathbf{S}\mathbf{S}^\top\mathbf{1} - \frac{1}{n}\mathbf{B}\mathbf{1}\right\| \leq \left(1 + \sqrt{2 \ln\left(\frac{1}{\delta}\right)}\right) \sqrt{\frac{1}{s}} \max_i \|\mathbf{b}_i\|.$$

462

□

463 **Remark 8.** For  $m$  sketching matrix  $\{\mathbf{S}_i\}_{i=1}^m$ , the bound in the Lemma 3 is

$$\left\|\frac{1}{n}\mathbf{B}\mathbf{S}_i\mathbf{S}_i^\top\mathbf{1} - \frac{1}{n}\mathbf{B}\mathbf{1}\right\| \leq \left(1 + \sqrt{2 \ln\left(\frac{m}{\delta}\right)}\right) \sqrt{\frac{1}{s}} \max_i \|\mathbf{b}_i\|,$$

464 with probability  $1 - \delta$  for any  $\delta > 0$  for all  $i \in \{1, 2, \dots, m\}$ . In the case that each worker machine  
465 holds data based on the uniform sketching matrix the local gradient is close to the exact gradient.  
466 Thus the local second order update acts as a good approximate to the exact Netwon update.

467 Now we consider the update rule of GIANT [30] where the update is done in two rounds in each  
468 iteration. In the first round each worker machine computes and send the local gradient and the  
469 center machine computes the exact gradient  $\mathbf{g}_t$  in iteration  $t$ . Next the center machine broadcasts  
470 the exact gradient and each worker machine computes the local Hessian and send  $\tilde{\mathbf{p}}_{i,t} = (\mathbf{H}_{i,t})^{-1}\mathbf{g}_t$   
471 to the center machine and the center machine computes the approximate Newton direction  $\tilde{\mathbf{p}}_t =$   
472  $\frac{1}{m} \sum_{i=1}^m \tilde{\mathbf{p}}_{i,t}$ . Now based on this we restate the following lemma (Lemma 6 [30]).

473 **Lemma 4.** Let  $\{\mathbf{S}_i\}_{i=1}^m \in \mathbb{R}^{n \times s}$  be sketching matrices based on Lemma 2. Let  $\phi_t$  be defined in (10)  
474 and  $\tilde{\mathbf{p}}_t$  be the update. It holds that

$$\min_{\mathbf{p}} \phi_t(\mathbf{p}) \leq \phi_t(\tilde{\mathbf{p}}_t) \leq (1 - \zeta^2) \min_{\mathbf{p}} \phi_t(\mathbf{p}),$$

475 where  $\zeta = \nu\left(\frac{\eta}{\sqrt{m}} + \frac{\eta^2}{1-\eta}\right)$  and  $\nu = \frac{\sigma_{max}(\mathbf{A}^\top \mathbf{A})}{\sigma_{max}(\mathbf{A}^\top \mathbf{A}) + n\lambda} \leq 1$ .

476 Now we prove similar guarantee for the update according to COMRADE in Algorithm 1.

477 **Lemma 5.** Let  $\{\mathbf{S}_i\}_{i=1}^m \in \mathbb{R}^{n \times s}$  be sketching matrices based on Lemma 2. Let  $\phi_t$  be defined in (10)  
478 and  $\hat{\mathbf{p}}_t$  be defined in Algorithm 1 ( $\beta = 0$ )

$$\min_{\mathbf{p}} \phi_t(\mathbf{p}) \leq \phi_t(\hat{\mathbf{p}}_t) \leq \epsilon^2 + (1 - \zeta^2) \min_{\mathbf{p}} \phi_t(\mathbf{p}),$$

479 where  $\epsilon = \frac{1}{1-\eta} \frac{1}{\sqrt{\sigma_{min}(\mathbf{H}_t)}} (1 + \sqrt{2 \ln\left(\frac{m}{\delta}\right)}) \sqrt{\frac{1}{s}} \max_i \|\mathbf{b}_i\|$  and  $\zeta = \nu\left(\frac{\eta}{\sqrt{m}} + \frac{\eta^2}{1-\eta}\right)$  and  $\nu =$   
480  $\frac{\sigma_{max}(\mathbf{A}^\top \mathbf{A})}{\sigma_{max}(\mathbf{A}^\top \mathbf{A}) + n\lambda}$ .

481 *Proof.* First consider the quadratic function (10)

$$\begin{aligned} \phi_t(\hat{\mathbf{p}}_t) - \phi_t(\mathbf{p}^*) &= \frac{1}{2} \|\mathbf{H}_t^{\frac{1}{2}}(\hat{\mathbf{p}}_t - \mathbf{p}^*)\|^2 \\ &\leq \underbrace{(\|\mathbf{H}_t^{\frac{1}{2}}(\hat{\mathbf{p}}_t - \tilde{\mathbf{p}}_t)\|^2)}_{Term1} + \underbrace{(\|\mathbf{H}_t^{\frac{1}{2}}(\tilde{\mathbf{p}}_t - \mathbf{p}^*)\|^2)}_{Term2}, \end{aligned} \tag{12}$$

where  $\tilde{\mathbf{p}}_t = \frac{1}{m} \sum_{i=1}^m (\mathbf{H}_{i,t})^{-1} \mathbf{g}_t$ . First we bound the Term 2 of (12) using the quadratic function and Lemma 4

$$\begin{aligned} \frac{1}{2} \left\| \mathbf{H}_t^{\frac{1}{2}} (\tilde{\mathbf{p}}_t - \mathbf{p}^*) \right\|^2 &\leq \zeta^2 \left\| \mathbf{H}_t^{\frac{1}{2}} \mathbf{p}^* \right\|^2 \quad (\text{Using Lemma 4}) \\ &= -\zeta^2 \phi_t(\mathbf{p}^*). \end{aligned} \quad (13)$$

The step in equation (13) is from the definition of the function  $\phi_t$  and  $\mathbf{p}^*$ . It can be shown that

$$\phi_t(\mathbf{p}^*) = - \left\| \mathbf{H}_t^{\frac{1}{2}} \mathbf{p}^* \right\|^2.$$

Now we bound the Term 1 in (12). By Lemma 2, we have  $(1 - \eta) \mathbf{A}_t^\top \mathbf{A}_t \preceq \mathbf{A}_t^\top \mathbf{S}_i \mathbf{S}_i^\top \mathbf{A}_t \preceq (1 + \eta) \mathbf{A}_t^\top \mathbf{A}_t$ . Following we have  $(1 - \eta) \mathbf{H}_t \preceq \mathbf{H}_{i,t} \preceq (1 + \eta) \mathbf{H}_t$ . Thus there exists matrix  $\xi_i$  satisfying

$$\mathbf{H}_t^{\frac{1}{2}} \mathbf{H}_{i,t}^{-1} \mathbf{H}_t^{\frac{1}{2}} = \mathbf{I} + \xi_i \quad \text{and} \quad -\frac{\eta}{1 + \eta} \preceq \xi_i \preceq \frac{\eta}{1 - \eta},$$

So we have,

$$\left\| \mathbf{H}_t^{\frac{1}{2}} \mathbf{H}_{i,t}^{-1} \mathbf{H}_t^{\frac{1}{2}} \right\| \leq 1 + \frac{\eta}{1 - \eta} = \frac{1}{1 - \eta}. \quad (14)$$

Now we have

$$\begin{aligned} \left\| \mathbf{H}_t^{\frac{1}{2}} (\hat{\mathbf{p}}_t - \tilde{\mathbf{p}}_t) \right\| &= \left\| \mathbf{H}_t^{\frac{1}{2}} \frac{1}{m} \sum_{i=1}^m (\hat{\mathbf{p}}_{i,t} - \tilde{\mathbf{p}}_{i,t}) \right\| \\ &\leq \frac{1}{m} \sum_{i=1}^m \left\| \mathbf{H}_t^{\frac{1}{2}} (\hat{\mathbf{p}}_{i,t} - \tilde{\mathbf{p}}_{i,t}) \right\| \\ &= \frac{1}{m} \sum_{i=1}^m \left\| \mathbf{H}_t^{\frac{1}{2}} \mathbf{H}_{i,t}^{-1} (\mathbf{g}_{i,t} - \mathbf{g}_t) \right\| \\ &= \frac{1}{m} \sum_{i=1}^m \left\| \mathbf{H}_t^{\frac{1}{2}} \mathbf{H}_{i,t}^{-1} \mathbf{H}_t^{\frac{1}{2}} \mathbf{H}_t^{-\frac{1}{2}} (\mathbf{g}_{i,t} - \mathbf{g}_t) \right\| \\ &\leq \frac{1}{m} \sum_{i=1}^m \left\| \mathbf{H}_t^{\frac{1}{2}} \mathbf{H}_{i,t}^{-1} \mathbf{H}_t^{\frac{1}{2}} \right\| \left\| \mathbf{H}_t^{-\frac{1}{2}} (\mathbf{g}_{i,t} - \mathbf{g}_t) \right\| \\ &\leq \frac{1}{1 - \eta} \frac{1}{m} \sum_{i=1}^m \left\| \mathbf{H}_t^{-\frac{1}{2}} (\mathbf{g}_{i,t} - \mathbf{g}_t) \right\| \quad (\text{Using (14)}) \\ &\leq \frac{1}{1 - \eta} \frac{1}{\sqrt{\sigma_{\min}(\mathbf{H}_t)}} \frac{1}{m} \sum_{i=1}^m \left\| (\mathbf{g}_{i,t} - \mathbf{g}_t) \right\|. \end{aligned} \quad (15)$$

Now we bound  $\left\| (\mathbf{g}_{i,t} - \mathbf{g}_t) \right\|$  using Lemma 3,

$$\left\| (\mathbf{g}_{i,t} - \mathbf{g}_t) \right\| = \left\| \frac{1}{n} \mathbf{B} \mathbf{S} \mathbf{S}^\top \mathbf{1} - \frac{1}{n} \mathbf{B} \mathbf{1} \right\| \leq (1 + \sqrt{2 \ln(\frac{m}{\delta})}) \sqrt{\frac{1}{s}} \max_i \left\| \mathbf{b}_i \right\|.$$

Plugging it into equation (15) we get,

$$\begin{aligned} \left\| \mathbf{H}_t^{\frac{1}{2}} (\hat{\mathbf{p}}_t - \tilde{\mathbf{p}}_t) \right\| &\leq \frac{1}{1 - \eta} \frac{1}{\sqrt{\sigma_{\min}(\mathbf{H}_t)}} \frac{1}{m} \sum_{i=1}^m \left\| (\mathbf{g}_{i,t} - \mathbf{g}_t) \right\| \\ &\leq \frac{1}{1 - \eta} \frac{1}{\sqrt{\sigma_{\min}(\mathbf{H}_t)}} (1 + \sqrt{2 \ln(\frac{m}{\delta})}) \sqrt{\frac{1}{s}} \max_i \left\| \mathbf{b}_i \right\|. \end{aligned} \quad (16)$$

Now collecting the terms of (16) and (13) and plugging them into (12) we have

$$\begin{aligned} \phi_t(\hat{\mathbf{p}}_t) - \phi_t(\mathbf{p}^*) &\leq \epsilon^2 - \zeta^2 \phi_t(\mathbf{p}^*) \\ \Rightarrow \phi_t(\hat{\mathbf{p}}_t) &\leq \epsilon^2 + (1 - \zeta^2) \phi_t(\mathbf{p}^*), \end{aligned}$$

where  $\epsilon$  is as defined in (4).

494

□

495 **Lemma 6.** Let  $\zeta \in (0, 1), \epsilon$  be any fixed parameter. And  $\hat{\mathbf{p}}_t$  satisfies  $\phi_t(\hat{\mathbf{p}}_t) \leq \epsilon^2 + (1 -$   
 496  $\zeta^2) \min_{\mathbf{p}} \phi_t(\mathbf{p})$ . Under the Assumption 1 (Hessian  $L$ -Lipschitz) and  $\Delta_t = \mathbf{w}_t - \mathbf{w}^*$  satisfies

$$\Delta_{t+1}^\top \mathbf{H}_t \Delta_{t+1} \leq L \|\Delta_{t+1}\| \|\Delta_t\|^2 + \frac{\zeta^2}{1 - \zeta^2} \Delta_t^\top \mathbf{H}_t \Delta_t + 2\epsilon^2.$$

497 *Proof.* We have  $\mathbf{w}_{t+1} = \mathbf{w}_t - \hat{\mathbf{p}}_t$ ,  $\Delta_t = \mathbf{w}_t - \mathbf{w}^*$  and  $\Delta_{t+1} = \mathbf{w}_{t+1} - \mathbf{w}^*$ . Also  $\hat{\mathbf{p}}_t = \mathbf{w}_t - \mathbf{w}_{t+1} =$   
 498  $\Delta_t - \Delta_{t+1}$ . From the definition of  $\phi$  we have,

$$\begin{aligned} \phi_t(\hat{\mathbf{p}}_t) &= \frac{1}{2} (\Delta_t - \Delta_{t+1})^\top \mathbf{H}_t (\Delta_t - \Delta_{t+1}) - (\Delta_t - \Delta_{t+1})^\top \mathbf{g}_t, \\ (1 - \zeta^2) \phi_t\left(\frac{1}{(1 - \zeta^2)} \Delta_t\right) &= \frac{1}{2(1 - \zeta^2)} \Delta_t^\top \mathbf{H}_t \Delta_t - \Delta_t^\top \mathbf{g}_t. \end{aligned}$$

499 From the above two equation we have

$$\begin{aligned} &\phi_t(\hat{\mathbf{p}}_t) - (1 - \zeta^2) \phi_t\left(\frac{1}{(1 - \zeta^2)} \Delta_t\right) \\ &= \frac{1}{2} \Delta_{t+1}^\top \mathbf{H}_t \Delta_{t+1} - \frac{1}{2} \Delta_t^\top \mathbf{H}_t \Delta_{t+1} + \frac{1}{2} \Delta_{t+1}^\top \mathbf{g}_t - \frac{\zeta^2}{2(1 - \zeta^2)} \Delta_t^\top \mathbf{H}_t \Delta_t. \end{aligned}$$

500 From Lemma 5 the following holds

$$\begin{aligned} \phi_t(\hat{\mathbf{p}}_t) &\leq \epsilon^2 + (1 - \zeta^2) \min_{\mathbf{p}} \phi_t(\mathbf{p}) \\ &\leq \epsilon^2 + (1 - \zeta^2) \phi_t\left(\frac{1}{(1 - \zeta^2)} \Delta_t\right). \end{aligned}$$

501 So we have

$$\frac{1}{2} \Delta_{t+1}^\top \mathbf{H}_t \Delta_{t+1} - \Delta_t^\top \mathbf{H}_t \Delta_{t+1} + \Delta_{t+1}^\top \mathbf{g}_t - \frac{\zeta^2}{2(1 - \zeta^2)} \Delta_t^\top \mathbf{H}_t \Delta_t \leq \epsilon^2. \quad (17)$$

502 Consider  $\mathbf{g}_t = \mathbf{g}(\mathbf{w}_t)$

$$\begin{aligned} \mathbf{g}(\mathbf{w}_t) &= \mathbf{g}(\mathbf{w}^*) + \left( \int_0^1 \nabla^2 f(\mathbf{w}^* + z(\mathbf{w}_t - \mathbf{w}^*)) dz \right) (\mathbf{w}_t - \mathbf{w}^*) \\ &= \left( \int_0^1 \nabla^2 f(\mathbf{w}^* + z(\mathbf{w}_t - \mathbf{w}^*)) dz \right) \Delta_t \quad (\text{as } \mathbf{g}(\mathbf{w}^*) = 0). \end{aligned}$$

503 Now we bound the following

$$\begin{aligned} \|\mathbf{H}_t \Delta_t - \mathbf{g}(\mathbf{w}_t)\| &\leq \|\Delta_t\| \left\| \int_0^1 [\nabla^2 f(\mathbf{w}_t) - \nabla^2 f(\mathbf{w}^* + z(\mathbf{w}_t - \mathbf{w}^*))] dz \right\| \\ &\leq \|\Delta_t\| \int_0^1 \|\nabla^2 f(\mathbf{w}_t) - \nabla^2 f(\mathbf{w}^* + z(\mathbf{w}_t - \mathbf{w}^*))\| dz \quad (\text{By Jensen's Inequality}) \\ &\leq \|\Delta_t\| \int_0^1 (1 - z) L \|\mathbf{w}_t - \mathbf{w}^*\| dz \quad (\text{by } L\text{-Lipschitz assumption}) \\ &= \frac{L}{2} \|\Delta_t\|^2. \end{aligned}$$

504 Plugging it into (17) we have

$$\begin{aligned} \Delta_{t+1}^\top \mathbf{H}_t \Delta_{t+1} &\leq 2 \Delta_{t+1}^\top (\mathbf{H}_t \Delta_t - \mathbf{g}_t) + \frac{\zeta^2}{(1 - \zeta^2)} \Delta_t^\top \mathbf{H}_t \Delta_t + 2\epsilon^2 \\ &\leq 2 \|\Delta_{t+1}\| \|\mathbf{H}_t \Delta_t - \mathbf{g}_t\| + \frac{\zeta^2}{(1 - \zeta^2)} \Delta_t^\top \mathbf{H}_t \Delta_t + 2\epsilon^2 \\ &\leq L \|\Delta_{t+1}\| \|\Delta_t\|^2 + \frac{\zeta^2}{(1 - \zeta^2)} \Delta_t^\top \mathbf{H}_t \Delta_t + 2\epsilon^2. \end{aligned}$$

505 □

506 **Proof of Theorem 1**

507 *Proof.* From the Lemma 6 with probability  $1 - \delta$

$$\begin{aligned}\Delta_{t+1}^\top \mathbf{H}_t \Delta_{t+1} &\leq L \|\Delta_{t+1}\| \|\Delta_t\|^2 + \frac{\zeta^2}{(1-\zeta^2)} \Delta_t^\top \mathbf{H}_t \Delta_t + 2\epsilon^2 \\ &\leq L \|\Delta_{t+1}\| \|\Delta_t\|^2 + \left(\frac{\zeta^2}{1-\zeta^2} \sigma_{\max}(\mathbf{H}_t)\right) \|\Delta_t\|^2 + 2\epsilon^2.\end{aligned}$$

508 So we have,

$$\|\Delta_{t+1}\| \leq \max\left\{\sqrt{\frac{\sigma_{\max}(\mathbf{H}_t)}{\sigma_{\min}(\mathbf{H}_t)} \left(\frac{\zeta^2}{1-\zeta^2}\right) \|\Delta_t\|}, \frac{L}{\sigma_{\min}(\mathbf{H}_t)} \|\Delta_t\|^2\right\} + \frac{2\epsilon}{\sqrt{\sigma_{\min}(\mathbf{H}_t)}}.$$

509 □

510 **9 Appendix B: Analysis of Section 4**

511 In this section we provide the theoretical analysis of the Byzantine robust method explained in  
512 Section 4 and prove the statistical guarantee. In any iteration  $t$  the following holds

$$\begin{aligned}|\mathcal{U}_t| &= |(\mathcal{U}_t \cap \mathcal{M}_t)| + |(\mathcal{U}_t \cap \mathcal{B}_t)| \\ |\mathcal{M}_t| &= |(\mathcal{U}_t \cap \mathcal{M}_t)| + |(\mathcal{M}_t \cap \mathcal{T}_t)|.\end{aligned}$$

513 Combining both we have

$$|\mathcal{U}_t| = |\mathcal{M}_t| - |(\mathcal{M}_t \cap \mathcal{T}_t)| + |(\mathcal{U}_t \cap \mathcal{B}_t)|.$$

514 **Lemma 7.** Let  $\{\mathbf{S}_i\}_{i=1}^m \in \mathbb{R}^{n \times s}$  be sketching matrices based on Lemma 2. Let  $\phi_t$  be defined in (10)  
515 and  $\hat{\mathbf{p}}_t$  be defined in Algorithm 1. It holds that

$$\min_{\mathbf{p}} \phi_t(\mathbf{p}) \leq \phi_t(\hat{\mathbf{p}}_t) \leq \epsilon_{\text{byz}}^2 + (1 - \zeta_{\text{byz}}^2) \phi(\mathbf{p}^*),$$

516 where  $\epsilon_{\text{byz}}$  and  $\zeta_{\text{byz}}$  is defined in (5) and (6) respectively.

517 *Proof.* In the following analysis we omit the subscript ' $t$ '. From the definition of the quadratic  
518 function (10) we know that

$$\phi(\hat{\mathbf{p}}) - \phi(\mathbf{p}^*) = \frac{1}{2} \|\mathbf{H}^{\frac{1}{2}}(\hat{\mathbf{p}} - \mathbf{p}^*)\|^2.$$

519 Now we consider

$$\begin{aligned}\frac{1}{2} \|\mathbf{H}^{\frac{1}{2}}(\hat{\mathbf{p}} - \mathbf{p}^*)\|^2 &= \frac{1}{2} \|\mathbf{H}^{\frac{1}{2}} \left( \frac{1}{|\mathcal{U}|} \sum_{i \in \mathcal{U}} \hat{\mathbf{p}}_i - \mathbf{p}^* \right)\|^2 \\ &= \frac{1}{2} \|\mathbf{H}^{\frac{1}{2}} \frac{1}{|\mathcal{U}|} \left( \sum_{i \in \mathcal{M}} (\hat{\mathbf{p}}_i - \mathbf{p}^*) - \sum_{i \in (\mathcal{M} \cap \mathcal{T})} (\hat{\mathbf{p}}_i - \mathbf{p}^*) + \sum_{i \in (\mathcal{U} \cap \mathcal{B})} (\hat{\mathbf{p}}_i - \mathbf{p}^*) \right)\|^2 \\ &\leq \underbrace{\|\mathbf{H}^{\frac{1}{2}} \frac{1}{|\mathcal{U}|} \left( \sum_{i \in \mathcal{M}} (\hat{\mathbf{p}}_i - \mathbf{p}^*) \right)\|^2}_{\text{Term1}} + \underbrace{2 \|\mathbf{H}^{\frac{1}{2}} \frac{1}{|\mathcal{U}|} \sum_{i \in (\mathcal{M} \cap \mathcal{T})} (\hat{\mathbf{p}}_i - \mathbf{p}^*)\|^2}_{\text{Term2}} + \underbrace{2 \|\mathbf{H}^{\frac{1}{2}} \frac{1}{|\mathcal{U}|} \sum_{i \in (\mathcal{U} \cap \mathcal{B})} (\hat{\mathbf{p}}_i - \mathbf{p}^*)\|^2}_{\text{Term3}}.\end{aligned}$$

520 Now we bound each term separately and use the result of the Lemma 5 to bound each term.

$$\begin{aligned}\text{Term1} &= \|\mathbf{H}^{\frac{1}{2}} \frac{1}{|\mathcal{U}|} \left( \sum_{i \in \mathcal{M}} (\hat{\mathbf{p}}_i - \mathbf{p}^*) \right)\|^2 \\ &= \left( \frac{1-\alpha}{1-\beta} \right)^2 \|\mathbf{H}^{\frac{1}{2}} \frac{1}{|\mathcal{M}|} \left( \sum_{i \in \mathcal{M}} (\hat{\mathbf{p}}_i - \mathbf{p}^*) \right)\|^2 \\ &\leq \left( \frac{1-\alpha}{1-\beta} \right)^2 [\epsilon^2 + \zeta_{\mathcal{M}}^2 \|\mathbf{H}^{\frac{1}{2}} \mathbf{p}^*\|^2],\end{aligned}$$

521 where  $\zeta_{\mathcal{M}} = \nu(\frac{\eta}{\sqrt{|\mathcal{M}|}} + \frac{\eta^2}{1-\eta}) = \nu(\frac{\eta}{\sqrt{(1-\alpha)m}} + \frac{\eta^2}{1-\eta})$ .

522 Similarly the Term 2 can be bonded as it is a bound on good machines

$$\begin{aligned} Term2 &= 2\|\mathbf{H}^{\frac{1}{2}}\frac{1}{|\mathcal{U}|} \sum_{i \in (\mathcal{M} \cap \mathcal{T})} (\hat{\mathbf{p}}_i - \mathbf{p}^*)\|^2 \\ &= 2\left(\frac{1-\alpha}{1-\beta}\right)^2 \|\mathbf{H}^{\frac{1}{2}}\frac{1}{|\mathcal{M} \cap \mathcal{T}|} \sum_{i \in (\mathcal{M} \cap \mathcal{T})} (\hat{\mathbf{p}}_i - \mathbf{p}^*)\|^2 \\ &\leq 2\left(\frac{1-\alpha}{1-\beta}\right)^2 [\epsilon^2 + \zeta_{\mathcal{M} \cap \mathcal{T}}^2 \|\mathbf{H}^{\frac{1}{2}} \mathbf{p}^*\|^2], \end{aligned}$$

523 where  $\zeta_{\mathcal{M} \cap \mathcal{T}} = \nu(\frac{\eta}{\sqrt{|\mathcal{M} \cap \mathcal{T}|}} + \frac{\eta^2}{1-\eta}) \leq \nu(\frac{\eta}{\sqrt{(1-\beta)m}} + \frac{\eta^2}{1-\eta})$ .

524 For the Term 3 we know that  $\beta > \alpha$  so all the untrimmed worker norm is bounded by a good machine  
525 as at least one good machine gets trimmed.

$$\begin{aligned} Term3 &= 2\|\mathbf{H}^{\frac{1}{2}}\frac{1}{|\mathcal{U}|} \sum_{i \in (\mathcal{U} \cap \mathcal{B})} (\hat{\mathbf{p}}_i - \mathbf{p}^*)\|^2 \\ &\leq 2\sigma_{max}(\mathbf{H})\left(\frac{|\mathcal{U} \cap \mathcal{B}|}{|\mathcal{U}|}\right)^2 \left\| \frac{1}{|\mathcal{U} \cap \mathcal{B}|} \sum_{i \in (\mathcal{U} \cap \mathcal{B})} (\hat{\mathbf{p}}_i - \mathbf{p}^*) \right\|^2 \\ &\leq 2\sigma_{max}(\mathbf{H})\left(\frac{|\mathcal{U} \cap \mathcal{B}|}{|\mathcal{U}|}\right)^2 \frac{1}{|\mathcal{U} \cap \mathcal{B}|} \sum_{i \in (\mathcal{U} \cap \mathcal{B})} \|(\hat{\mathbf{p}}_i - \mathbf{p}^*)\|^2 \\ &\leq 4\sigma_{max}(\mathbf{H})\left(\frac{|\mathcal{U} \cap \mathcal{B}|}{|\mathcal{U}|}\right)^2 \frac{1}{|\mathcal{U} \cap \mathcal{B}|} \sum_{i \in (\mathcal{U} \cap \mathcal{B})} (\|\hat{\mathbf{p}}_i\|^2 + \|\mathbf{p}^*\|^2) \\ &\leq 4\sigma_{max}(\mathbf{H})\left(\frac{|\mathcal{U} \cap \mathcal{B}|}{|\mathcal{U}|}\right)^2 \max_{i \in \mathcal{M}} (\|\hat{\mathbf{p}}_i\|^2 + \|\mathbf{p}^*\|^2) \\ &\leq 4\sigma_{max}(\mathbf{H})\left(\frac{|\mathcal{U} \cap \mathcal{B}|}{|\mathcal{U}|}\right)^2 \max_{i \in \mathcal{M}} (\|\hat{\mathbf{p}}_i - \mathbf{p}^*\|^2 + 2\|\mathbf{p}^*\|^2) \\ &\leq 4\kappa\left(\frac{|\mathcal{U} \cap \mathcal{B}|}{|\mathcal{U}|}\right)^2 \max_{i \in \mathcal{M}} (\|\mathbf{H}^{\frac{1}{2}}(\hat{\mathbf{p}}_i - \mathbf{p}^*)\|^2 + 2\|\mathbf{H}^{\frac{1}{2}}\mathbf{p}^*\|^2) \\ &\leq 4\kappa\left(\frac{|\mathcal{U} \cap \mathcal{B}|}{|\mathcal{U}|}\right)^2 (\epsilon^2 + (2 + \zeta_1^2)\|\mathbf{H}^{\frac{1}{2}}\mathbf{p}^*\|^2) \\ &\leq 4\kappa\left(\frac{\alpha}{1-\beta}\right)^2 (\epsilon^2 + (2 + \zeta_1^2)\|\mathbf{H}^{\frac{1}{2}}\mathbf{p}^*\|^2), \end{aligned}$$

526 where  $\zeta_1 = \nu(\eta + \frac{\eta^2}{1-\eta}) = \frac{\nu}{1-\eta}$  and  $\kappa = \frac{\sigma_{max}(\mathbf{H})}{\sigma_{min}(\mathbf{H})}$ .

527 Combining all the bounds on Term1 , Term2 and Term3 we have

$$\frac{1}{2}\|\mathbf{H}^{\frac{1}{2}}(\hat{\mathbf{p}} - \mathbf{p}^*)\|^2 \leq \epsilon_{byz}^2 + \zeta_{byz}^2 \|\mathbf{H}^{\frac{1}{2}}\mathbf{p}^*\|^2,$$

528 where

$$\begin{aligned} \epsilon_{byz}^2 &= \left( 3\left(\frac{1-\alpha}{1-\beta}\right)^2 + 4\kappa\left(\frac{\alpha}{1-\beta}\right)^2 \right) \epsilon^2, \\ \zeta_{byz}^2 &= 2\left(\frac{1-\alpha}{1-\beta}\right)^2 \zeta_{\mathcal{M} \cap \mathcal{T}}^2 + \left(\frac{1-\alpha}{1-\beta}\right)^2 \zeta_{\mathcal{M}}^2 + 4\kappa\left(\frac{\alpha}{1-\beta}\right)^2 (2 + \zeta_1^2). \end{aligned}$$

529 Finally we have

$$\begin{aligned} \phi(\hat{\mathbf{p}}) - \phi(\mathbf{p}^*) &\leq \epsilon_{byz}^2 - \zeta_{byz}^2 \phi(\mathbf{p}^*) \\ \Rightarrow \phi(\hat{\mathbf{p}}) &\leq \epsilon_{byz}^2 + (1 - \zeta_{byz}^2) \phi(\mathbf{p}^*). \end{aligned}$$

530

□

531 **Lemma 8.** Let  $\zeta_{byz} \in (0, 1)$ ,  $\epsilon_{byz}$  be any fixed parameter. And  $\hat{\mathbf{p}}_t$  satisfies  $\phi_t(\hat{\mathbf{p}}_t) \leq \epsilon_{byz}^2 + (1 -$   
532  $\zeta_{byz}^2) \min_{\mathbf{p}} \phi_t(\mathbf{p})$ . Under the Assumption 1 (Hessian L-Lipschitz) and  $\Delta_t = \mathbf{w}_t - \mathbf{w}^*$  satisfies

$$\Delta_{t+1}^T \mathbf{H}_t \Delta_{t+1} \leq L \|\Delta_{t+1}\| \|\Delta_t\|^2 + \frac{\zeta_{byz}^2}{1 - \zeta_{byz}^2} \Delta_t^T \mathbf{H}_t \Delta_t + 2\epsilon_{byz}^2.$$

533 *Proof.* We choose  $\zeta = \zeta_{byz}$  and  $\epsilon = \epsilon_{byz}$  from the Lemma 7 and follow the proof of Lemma 6 to  
534 obtain the desired bound.  $\square$

## 535 **Proof of Theorem 2**

536 *Proof.* We get the desired bound by developing from the result of the Lemma 8 and following the  
537 proof of Theorem 1  $\square$

## 538 **10 Appendix C: Analysis of Section 5**

539 First we prove the following lemma that will be useful in our subsequent calculations. Consider  
540 that  $\mathcal{Q}(\hat{\mathbf{p}}) = \frac{1}{|B|} \sum_{i \in B} \mathcal{Q}(\hat{\mathbf{p}}_i)$ . And also we use the following notation  $\zeta_B = \nu(\frac{\eta}{\sqrt{|B|}} + \frac{\eta^2}{1-\eta})$ ,

541  $\nu = \frac{\sigma_{max}(\mathbf{A}^\top \mathbf{A})}{\sigma_{max}(\mathbf{A}^\top \mathbf{A}) + n\lambda} \leq 1.$

542 **Lemma 9.** If  $\mathcal{Q}(\hat{\mathbf{p}}_i)$  is the local update direction and  $\mathbf{p}^*$  is the optimal solution to the quadratic  
543 function  $\phi$  then

$$\left\| \mathbf{H}^{\frac{1}{2}}(\mathcal{Q}(\hat{\mathbf{p}}_i) - \mathbf{p}^*) \right\|^2 \leq 1 + \kappa(1 - \rho)\epsilon^2 + (\zeta_B^2 + \kappa(1 - \rho)((1 + \zeta_1^2))) \left\| \mathbf{H}^{\frac{1}{2}} \mathbf{p}^* \right\|^2,$$

544 where  $\mathbf{H}$  is the exact Hessian and

$$\begin{aligned} \epsilon_1 &= \sqrt{(1 + \kappa(1 - \rho))\epsilon}, \\ \zeta_{comp,B}^2 &= (\zeta_B^2 + \kappa(1 - \rho)((1 + \zeta_1^2))). \end{aligned}$$

545  $\epsilon$  is defined in equation (4) and

*Proof.*

$$\begin{aligned} \left\| \mathbf{H}^{\frac{1}{2}}(\mathcal{Q}(\hat{\mathbf{p}}) - \mathbf{p}^*) \right\|^2 &= \left\| \mathbf{H}^{\frac{1}{2}}(\mathcal{Q}(\hat{\mathbf{p}}) - \hat{\mathbf{p}} + \hat{\mathbf{p}} - \mathbf{p}^*) \right\|^2 \\ &\leq 2 \left( \underbrace{\left\| \mathbf{H}^{\frac{1}{2}}(\mathcal{Q}(\hat{\mathbf{p}}) - \hat{\mathbf{p}}) \right\|^2}_{Term1} + \underbrace{\left\| \mathbf{H}^{\frac{1}{2}}(\hat{\mathbf{p}} - \mathbf{p}^*) \right\|^2}_{Term2} \right). \end{aligned} \quad (18)$$

546 Following the proof of Lemma 5 we get

$$\left\| \mathbf{H}^{\frac{1}{2}}(\hat{\mathbf{p}}_i - \mathbf{p}^*) \right\|^2 \leq \epsilon^2 + \zeta_1 \left\| \mathbf{H}^{\frac{1}{2}} \mathbf{p}^* \right\|^2, \quad (19)$$

547 where  $\epsilon$  is as defined in (4). Now we consider the term

$$\begin{aligned} \left\| \mathbf{H}^{\frac{1}{2}}(\mathcal{Q}(\hat{\mathbf{p}}_i) - \hat{\mathbf{p}}_i) \right\|^2 &\leq \sigma_{max}(\mathbf{H})(1 - \rho) \|\hat{\mathbf{p}}_i\|^2 \\ &\leq \sigma_{max}(\mathbf{H})(1 - \rho) (\|\hat{\mathbf{p}}_i - \mathbf{p}^*\|^2 + \|\mathbf{p}^*\|^2) \\ &\leq \frac{\sigma_{max}}{\sigma_{min}}(1 - \rho) \left( \left\| \mathbf{H}^{\frac{1}{2}}(\hat{\mathbf{p}}_i - \mathbf{p}^*) \right\|^2 + \left\| \mathbf{H}^{\frac{1}{2}} \mathbf{p}^* \right\|^2 \right) \\ &= \kappa(1 - \rho) \left( \left\| \mathbf{H}^{\frac{1}{2}}(\hat{\mathbf{p}}_i - \mathbf{p}^*) \right\|^2 + \left\| \mathbf{H}^{\frac{1}{2}} \mathbf{p}^* \right\|^2 \right) \\ &\leq \kappa(1 - \rho) \left( \epsilon^2 + (1 + \zeta_1^2) \left\| \mathbf{H}^{\frac{1}{2}} \mathbf{p}^* \right\|^2 \right) \quad \text{Using (19).} \end{aligned}$$



548 Now we use the above calculation and bound Term1

$$\begin{aligned} \left\| \mathbf{H}^{\frac{1}{2}}(\mathcal{Q}(\hat{\mathbf{p}}) - \hat{\mathbf{p}}) \right\|^2 &\leq \frac{1}{|B|} \sum_{i \in B} \left\| \mathbf{H}^{\frac{1}{2}}(\mathcal{Q}(\hat{\mathbf{p}}_i) - \hat{\mathbf{p}}_i) \right\|^2 \\ &\leq \kappa(1 - \rho) \left( \epsilon^2 + (1 + \zeta_1^2) \left\| \mathbf{H}^{\frac{1}{2}} \mathbf{p}^* \right\|^2 \right). \end{aligned} \quad (20)$$

549 We can bound the Term2 directly using the proof of Lemma 5

$$\left\| \mathbf{H}^{\frac{1}{2}}(\hat{\mathbf{p}} - \mathbf{p}^*) \right\|^2 \leq \epsilon^2 + \zeta_B^2 \left\| \mathbf{H}^{\frac{1}{2}} \mathbf{p}^* \right\|^2. \quad (21)$$

550 Now we use (20) and (21) and plug them in (18)

$$\left\| \mathbf{H}^{\frac{1}{2}}(\mathcal{Q}(\hat{\mathbf{p}}) - \mathbf{p}^*) \right\|^2 \leq (1 + \kappa(1 - \rho))\epsilon^2 + (\zeta_B^2 + \kappa(1 - \rho)((1 + \zeta_1^2)) \left\| \mathbf{H}^{\frac{1}{2}} \mathbf{p}^* \right\|^2.$$

551 Now we define

$$\begin{aligned} \epsilon_1 &= \sqrt{(1 + \kappa(1 - \rho))}\epsilon \\ \zeta_{comp,B}^2 &= (\zeta_B^2 + \kappa(1 - \rho)((1 + \zeta_1^2))). \end{aligned}$$

552

□

553 Now we have the robust update in iteration  $t$  to be  $\mathcal{Q}(\hat{\mathbf{p}}) = \frac{1}{|\mathcal{U}_t|} \sum_{i \in \mathcal{U}_t} \mathcal{Q}(\hat{\mathbf{p}}_{i,t})$ .

554 **Lemma 10.** Let  $\{\mathbf{S}_i\}_{i=1}^m \in \mathbb{R}^{n \times s}$  be sketching matrices based on Lemma 2. Let  $\phi_t$  be defined in  
555 (10) and  $\mathcal{Q}(\hat{\mathbf{p}}_t)$  be the update with  $\mathcal{Q}$  being  $\rho$ -approximate compressor. It holds that

$$\min_{\mathbf{p}} \phi_t(\mathbf{p}) \leq \phi_t(\mathcal{Q}(\hat{\mathbf{p}}_t)) \leq \epsilon_{comp,byz}^2 + (1 - \zeta_{comp,byz}^2) \phi_t(\mathbf{p}^*),$$

556 where  $\epsilon_{comp,byz}$  and  $\zeta_{comp,byz}^2$  is as defined in (7) and (8) respectively.

557 *Proof.* In the following analysis we omit the subscript ' $t$ '. From the definition of the quadratic  
558 function (10) we know that

$$\phi(\mathcal{Q}(\hat{\mathbf{p}})) - \phi(\mathbf{p}^*) = \frac{1}{2} \left\| \mathbf{H}^{\frac{1}{2}}(\mathcal{Q}(\hat{\mathbf{p}}) - \mathbf{p}^*) \right\|^2.$$

559 Now we consider

$$\begin{aligned} \frac{1}{2} \left\| \mathbf{H}^{\frac{1}{2}}(\mathcal{Q}(\hat{\mathbf{p}}) - \mathbf{p}^*) \right\|^2 &= \frac{1}{2} \left\| \mathbf{H}^{\frac{1}{2}} \left( \frac{1}{|\mathcal{U}|} \sum_{i \in \mathcal{U}} \mathcal{Q}(\hat{\mathbf{p}}_i) - \mathbf{p}^* \right) \right\|^2 \\ &= \frac{1}{2} \left\| \mathbf{H}^{\frac{1}{2}} \frac{1}{|\mathcal{U}|} \left( \sum_{i \in \mathcal{M}} (\mathcal{Q}(\hat{\mathbf{p}}_i) - \mathbf{p}^*) - \sum_{i \in (\mathcal{M} \cap \mathcal{T})} (\mathcal{Q}(\hat{\mathbf{p}}_i) - \mathbf{p}^*) + \sum_{i \in (\mathcal{U} \cap \mathcal{B})} (\mathcal{Q}(\hat{\mathbf{p}}_i) - \mathbf{p}^*) \right) \right\|^2 \\ &\leq \underbrace{\left\| \mathbf{H}^{\frac{1}{2}} \frac{1}{|\mathcal{U}|} \left( \sum_{i \in \mathcal{M}} (\mathcal{Q}(\hat{\mathbf{p}}_i) - \mathbf{p}^*) \right) \right\|^2}_{Term1} + \underbrace{2 \left\| \mathbf{H}^{\frac{1}{2}} \frac{1}{|\mathcal{U}|} \sum_{i \in (\mathcal{M} \cap \mathcal{T})} (\mathcal{Q}(\hat{\mathbf{p}}_i) - \mathbf{p}^*) \right\|^2}_{Term2} \\ &\quad + \underbrace{2 \left\| \mathbf{H}^{\frac{1}{2}} \frac{1}{|\mathcal{U}|} \sum_{i \in (\mathcal{U} \cap \mathcal{B})} (\mathcal{Q}(\hat{\mathbf{p}}_i) - \mathbf{p}^*) \right\|^2}_{Term3}. \end{aligned}$$

560 Now we bound each term separately and use the Lemma 9

$$\begin{aligned} Term1 &= \left\| \mathbf{H}^{\frac{1}{2}} \frac{1}{|\mathcal{U}|} \left( \sum_{i \in \mathcal{M}} (\mathcal{Q}(\hat{\mathbf{p}}_i) - \mathbf{p}^*) \right) \right\|^2 \\ &= \left( \frac{1 - \alpha}{1 - \beta} \right)^2 \left\| \mathbf{H}^{\frac{1}{2}} \frac{1}{|\mathcal{M}|} \left( \sum_{i \in \mathcal{M}} (\mathcal{Q}(\hat{\mathbf{p}}_i) - \mathbf{p}^*) \right) \right\|^2 \\ &\leq \left( \frac{1 - \alpha}{1 - \beta} \right)^2 [\epsilon_1^2 + \zeta_{comp,\mathcal{M}}^2 \left\| \mathbf{H}^{\frac{1}{2}} \mathbf{p}^* \right\|^2], \end{aligned}$$

561 where  $\zeta_{comp, \mathcal{M}}^2 = (\zeta_{\mathcal{M}}^2 + \kappa(1 - \rho)((1 + \zeta_1^2))$ . Similarly the Term 2 can be bonded as it is a bound on  
 562 good machines

$$\begin{aligned} Term2 &= 2\|\mathbf{H}^{\frac{1}{2}}\| \frac{1}{|\mathcal{U}|} \sum_{i \in (\mathcal{M} \cap \mathcal{T})} (\mathcal{Q}(\hat{\mathbf{p}}_i) - \mathbf{p}^*)\|^2 \\ &= 2\left(\frac{1 - \alpha}{1 - \beta}\right)^2 \|\mathbf{H}^{\frac{1}{2}}\| \frac{1}{|\mathcal{M} \cap \mathcal{T}|} \sum_{i \in (\mathcal{M} \cap \mathcal{T})} (\mathcal{Q}(\hat{\mathbf{p}}_i) - \mathbf{p}^*)\|^2 \\ &\leq 2\left(\frac{1 - \alpha}{1 - \beta}\right)^2 [\epsilon_1^2 + \zeta_{comp, \mathcal{M} \cap \mathcal{T}}^2 \|\mathbf{H}^{\frac{1}{2}} \mathbf{p}^*\|^2]. \end{aligned}$$

563 For the Term 3 we know that  $\beta > \alpha$  so all the untrimmed worker norm is bounded by a good machine  
 564 as at least one good machine gets trimmed.

$$\begin{aligned} Term3 &= 2\|\mathbf{H}^{\frac{1}{2}}\| \frac{1}{|\mathcal{U}|} \sum_{i \in (\mathcal{U} \cap \mathcal{B})} (\mathcal{Q}(\hat{\mathbf{p}}_i) - \mathbf{p}^*)\|^2 \\ &\leq 2\sigma_{max}(\mathbf{H}) \left(\frac{|\mathcal{U} \cap \mathcal{B}|}{|\mathcal{U}|}\right)^2 \left\| \frac{1}{|\mathcal{U} \cap \mathcal{B}|} \sum_{i \in (\mathcal{U} \cap \mathcal{B})} (\mathcal{Q}(\hat{\mathbf{p}}_i) - \mathbf{p}^*) \right\|^2 \\ &\leq 2\sigma_{max}(\mathbf{H}) \left(\frac{|\mathcal{U} \cap \mathcal{B}|}{|\mathcal{U}|}\right)^2 \frac{1}{|\mathcal{U} \cap \mathcal{B}|} \sum_{i \in (\mathcal{U} \cap \mathcal{B})} \|(\mathcal{Q}(\hat{\mathbf{p}}_i) - \mathbf{p}^*)\|^2 \\ &\leq 4\sigma_{max}(\mathbf{H}) \left(\frac{|\mathcal{U} \cap \mathcal{B}|}{|\mathcal{U}|}\right)^2 \frac{1}{|\mathcal{U} \cap \mathcal{B}|} \sum_{i \in (\mathcal{U} \cap \mathcal{B})} (\|\mathcal{Q}(\hat{\mathbf{p}}_i)\|^2 + \|\mathbf{p}^*\|^2) \\ &\leq 4\sigma_{max}(\mathbf{H}) \left(\frac{|\mathcal{U} \cap \mathcal{B}|}{|\mathcal{U}|}\right)^2 \max_{i \in \mathcal{M}} (\|\mathcal{Q}(\hat{\mathbf{p}}_i)\|^2 + \|\mathbf{p}^*\|^2) \\ &\leq 4\sigma_{max}(\mathbf{H}) \left(\frac{|\mathcal{U} \cap \mathcal{B}|}{|\mathcal{U}|}\right)^2 \max_{i \in \mathcal{M}} (\|\mathcal{Q}(\hat{\mathbf{p}}_i) - \mathbf{p}^*\|^2 + 2\|\mathbf{p}^*\|^2) \\ &\leq 4\kappa \left(\frac{|\mathcal{U} \cap \mathcal{B}|}{|\mathcal{U}|}\right)^2 \max_{i \in \mathcal{M}} (\|\mathbf{H}^{\frac{1}{2}} (\mathcal{Q}(\hat{\mathbf{p}}_i) - \mathbf{p}^*)\|^2 + 2\|\mathbf{H}^{\frac{1}{2}} \mathbf{p}^*\|^2) \\ &\leq 4\kappa \left(\frac{|\mathcal{U} \cap \mathcal{B}|}{|\mathcal{U}|}\right)^2 (\epsilon_1^2 + (2 + \zeta_1^2) \|\mathbf{H}^{\frac{1}{2}} \mathbf{p}^*\|^2) \\ &\leq 4\kappa \left(\frac{\alpha}{1 - \beta}\right)^2 (\epsilon_1^2 + (2 + \zeta_1^2) \|\mathbf{H}^{\frac{1}{2}} \mathbf{p}^*\|^2). \end{aligned}$$

565 Combining all the bounds on Term1 , Term2 and Term3 we have

$$\frac{1}{2} \|\mathbf{H}^{\frac{1}{2}} (\hat{\mathbf{p}} - \mathbf{p}^*)\|^2 \leq \epsilon_{byz}^2 + \zeta_{byz}^2 \|\mathbf{H}^{\frac{1}{2}} \mathbf{p}^*\|^2,$$

566 where

$$\begin{aligned} \epsilon_{comp, byz}^2 &= \left( 3 \left( \frac{1 - \alpha}{1 - \beta} \right)^2 + 4\kappa \left( \frac{\alpha}{1 - \beta} \right)^2 \right) \epsilon_1^2 \\ \zeta_{comp, byz}^2 &= 2 \left( \frac{1 - \alpha}{1 - \beta} \right)^2 \zeta_{comp, \mathcal{M} \cap \mathcal{T}}^2 + \left( \frac{1 - \alpha}{1 - \beta} \right)^2 \zeta_{comp, \mathcal{M}}^2 + 4\kappa \left( \frac{\alpha}{1 - \beta} \right)^2 (2 + \zeta_{comp, 1}^2). \end{aligned}$$

567 Finally we have

$$\begin{aligned} \phi(\hat{\mathbf{p}}) - \phi(\mathbf{p}^*) &\leq \epsilon_{comp, byz}^2 - \zeta_{comp, byz}^2 \phi(\mathbf{p}^*) \\ \Rightarrow \phi(\hat{\mathbf{p}}) &\leq \epsilon_{comp, byz}^2 + (1 - \zeta_{comp, byz}^2) \phi(\mathbf{p}^*). \end{aligned}$$

568

□

569 **Lemma 11.** Let  $\zeta_{comp, byz} \in (0, 1)$ ,  $\epsilon_{comp, byz}$  be any fixed parameter. And  $\mathcal{Q}(\hat{p}_t)$  satisfies  
 570  $\phi_t(\mathcal{Q}(\hat{p}_t)) \leq \epsilon_{byz}^2 + (1 - \zeta_{byz}^2) \min_{\mathbf{p}} \phi_t(\mathbf{p})$ . Under the Assumption 1(Hessian L-Lipschitz) and  
 571  $\Delta_t = \mathbf{w}_t - \mathbf{w}^*$  satisfies

$$\Delta_{t+1}^T \mathbf{H}_t \Delta_{t+1} \leq L \|\Delta_{t+1}\| \|\Delta_t\|^2 + \frac{\zeta_{comp, byz}^2}{1 - \zeta_{comp, byz}^2} \Delta_t^T \mathbf{H}_t \Delta_t + 2\epsilon_{comp, byz}^2.$$

572 *Proof.* We choose  $\zeta = \zeta_{comp,byz}$  and  $\epsilon = \epsilon_{comp,byz}$  from the Lemma 10 and follow the proof of  
573 Lemma 6 to obtain the desired bound.  $\square$

### 574 **Proof of Theorem 3**

575 *Proof.* We get the desired bound by developing from the result of the Lemma 11 and following the  
576 proof of Theorem 1  $\square$

## 577 **11 Additional Experiment**

578 In addition to the experimental results in Section 6, we provide some more experiments supporting  
579 the robustness of the COMRADE in two different types of attacks : 1. ‘Gaussian attack’: where the  
580 Byzantine workers add Gaussian Noise ( $\mathcal{N}(\mu, \sigma^2)$ ) to the update and 2. ‘random label attack’: where  
581 the Byzantine worker machines learns based on random labels instead of proper labels.

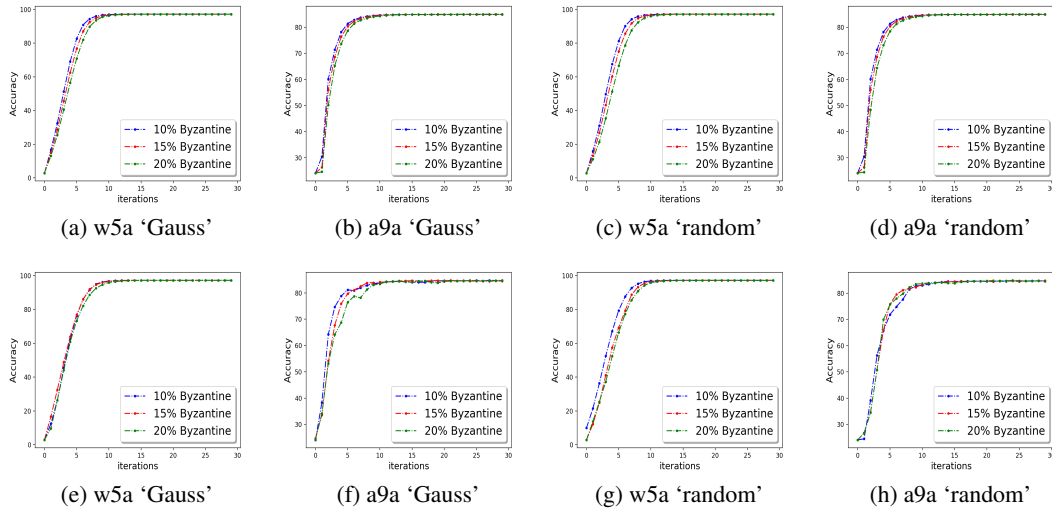

Figure 3: (First row) Accuracy of COMRADE with 10%, 15%, 20% Byzantine workers with ‘Gaussian’ attack for (a). w5a (b). a9a and ‘random label’ attack for (c). w5a (d).a9a. (Second row) Accuracy of COMRADE with  $p$ -approximate compressor (Section 5) with 10%, 15%, 20% Byzantine workers with ‘Gaussian’ attack for (a). w5a (b). a9a and ‘random label’ attack for (c). w5a (d).a9a.
